# Supplementary material for: Night shift work is associated with an increased risk of asthma
Source: PubMed Central journal article supplement (PMC7803886; doi:10.1136/thoraxjnl-2020-215218), 2020-11-16

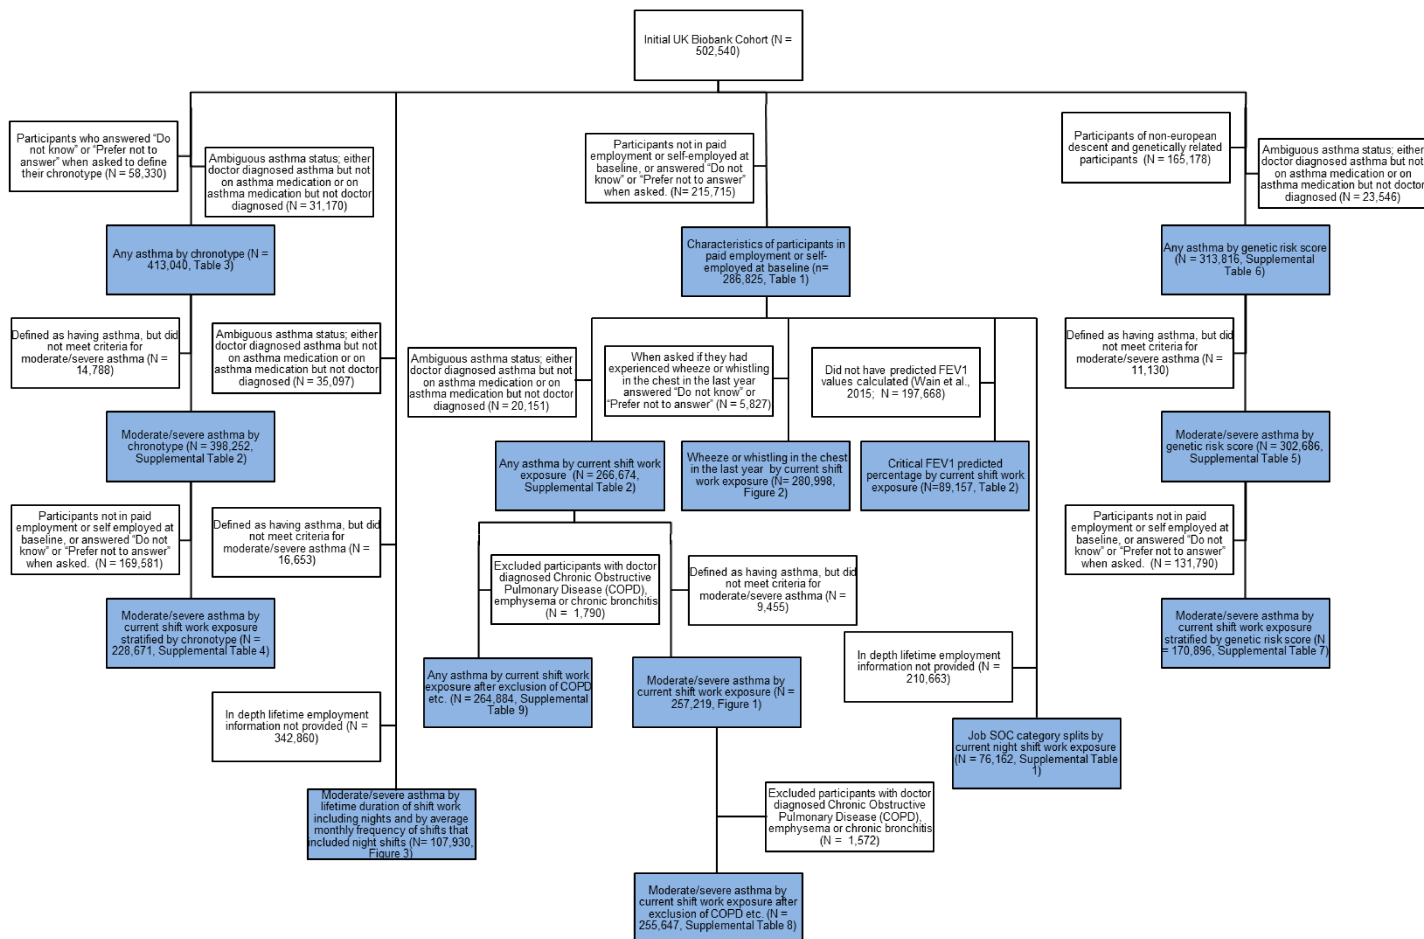

Supplement: thoraxjnl-2020-215218supp001.pdf [file thoraxjnl-2020-215218supp001.pdf]
