# Supplementary material for: Night shift work is associated with an increased risk of asthma
Source: PubMed Central journal article supplement (PMC7803886; doi:10.1136/thoraxjnl-2020-215218), 2020-11-16
Supplement: thoraxjnl-2020-215218supp002.pdf [file thoraxjnl-2020-215218supp002.pdf]

## 1 **Supplementary Methods**

### 2 **UK Biobank**

3 The UK Biobank study was approved by the National Health Service National Research Ethics  
4 Service (ref. 11/NW/0382), and all participants provided written informed consent to  
5 participate in the UK Biobank study.

### 6 **Shift Work Assessment**

7 We defined shift work as previously reported by Vetter et al (1), however, we combined  
8 'irregular or rotating shifts with some night shifts' and 'irregular or rotating shifts with  
9 usual night shifts' to form one group 'irregular shift work including nights'. Briefly,  
10 participants employed at baseline were asked to report whether their current main job  
11 involved shift work (i.e. a schedule falling outside of 9:00am to 5:00pm; by definition, such  
12 schedules involved afternoon, evening or night shifts (or rotating through these shifts)). If  
13 yes, participants were further asked whether their main job involved night shifts, defined as  
14 '...a work schedule that involves working through the normal sleeping hours, for instance,  
15 working through the hours from 12:00am to 6:00am'. For both questions, response options  
16 were 'never/rarely', 'sometimes', 'usually', or 'always' and included additional options:  
17 'prefer not to answer' and 'do not know'. Based on those two questions, we derived  
18 participants' current shift work status, categorized as 'day workers', 'shift worker, but only  
19 rarely if ever nights', 'irregular shift work including nights' and 'permanent night shifts'.  
20 In the lifetime employment assessment, individuals reported each job ever worked, the  
21 number of years in each job ever worked, the number of years in each job, and the number  
22 of night shifts per month each job entailed. We restricted our analysis to those individuals

23 who provided in depth lifetime employment information (N= 107,930), we restricted the  
24 employment history to only jobs worked prior to 2008, since this was when the diagnosis of  
25 asthma was taken at baseline. We aggregated duration (i.e., number of years working night  
26 shifts) and frequency (i.e., the average number of night shifts per month) of night shift work.

## 27 **Asthma Definition**

28 Cases of asthma were defined by including all those participants with doctor diagnosed  
29 asthma at baseline as well as also being on any medication used to treat asthma as defined  
30 by Shrine et al. 2019 (2). Cases of moderate-severe asthma were defined as having doctor  
31 diagnosed asthma at baseline as well as meeting BTS step 3-5 criteria, i.e. for stage 3 taking  
32  $\beta$ 2 agonists plus inhaled corticosteroid; stage 4 taking higher dose inhaled corticosteroids  
33 than stage 3 patients and addition of a fourth drug (eg, leukotriene receptor antagonist,  
34 theophylline); and stage 5, taking oral corticosteroid or omalizumab, or both (2). We  
35 excluded participants with doctor-diagnosed asthma who reported not to be on asthma  
36 medication (N=18,806) and those on asthma medication but who did not have doctor  
37 diagnosed asthma (N=1,345) from our analyses. When analysing the risk of moderate-severe  
38 we further excluded participants with asthma taking medication on BTS stage 1 and 2  
39 (N=9,455).

40 Within the parameters from the UK Biobank assessment centre data was the question  
41 relating to whether a participant had experienced 'Wheeze or whistling in the chest in the  
42 last year'. We excluded participants who answered "Do not know" or "Prefer not to answer"  
43 from any statistical analyses. Forced expiratory volume in 1-second (FEV<sub>1</sub>), predicted  
44 percentage, was also analysed. FEV<sub>1</sub> predicted percentages were calculated (3). FEV<sub>1</sub>  
45 predicted percentages were filtered to produce two sub-populations; FEV<sub>1</sub>  $\geq$  80% and FEV<sub>1</sub> <

46 80%, with the latter indicative of an obstructive respiratory pathology (4, 5) e.g. asthma (6,  
47 7). Participants were split into 'yes' and 'no' sub-populations for 'Wheeze or whistling in the  
48 chest in the last year'. These and the FEV<sub>1</sub> predicted percentage sub-populations were  
49 further split according to participant's current work shift schedule, previously outlined.

## 50 **Occupational Asthma**

51 We identified participants who were employed in jobs that might lead to the development  
52 of occupational asthma. These jobs included bakers, food processors, forestry workers,  
53 chemical workers, plastics and rubber workers, metal workers, welders, textile workers,  
54 electrical and electronic production workers, storage workers, farm workers, waiters,  
55 cleaners, painters, dental workers and laboratory technicians (8-11). We also identified  
56 occupations, in which a medical assessment might select against a person with asthma  
57 (Protective Service Officers (officers in armed forces, police officers (inspectors and above)  
58 and senior officers in fire, ambulance, prison and related services), science technicians and  
59 researchers, probation officers and Transport Associate Professionals (including airline pilots  
60 and flight engineers, ship and hovercraft officers, train drivers). Both of these were included  
61 as covariates in models 2 and 3.

## 62 **Chronotype**

63 Participants self-reported chronotype on a touch-screen questionnaire at baseline by  
64 answering a question taken from the Morningness-Eveningness questionnaire (question  
65 19;[12]). The question asks: "Do you consider yourself to be...." with response options  
66 "Definitely a 'morning' person", "More a 'morning' than 'evening' person", "More an  
67 'evening' than a 'morning' person," "Definitely an 'evening' person," "Do not know," and

68 “Prefer not to answer.” Subjects who responded “Do not know” or “Prefer not to answer”  
69 were set to missing. This single item has been shown to correlate with sleep timing and dim-  
70 light melatonin onset (13-15). For our analyses we combined “more a ‘morning’ than  
71 ‘evening’ person” with “more an ‘evening’ than ‘morning’ person” to form an intermediate  
72 group. In our initial analysis of chronotype in asthma, we included all individuals with  
73 asthma and chronotype information, N= 413,040 (N=398,252 for moderate-severe asthma).  
74 Subsequently we investigated shift work in asthma stratified by chronotype (N = 228,671);  
75 this excluded participants not in paid employment or self-employed at baseline, or  
76 answered “Do not know” or “Prefer not to say” when asked (N=169,581).

#### 77 **Genetic Risk Score for Asthma**

78 Genotyping in the UK Biobank was performed on two arrays, UK BiLEVE and UK Biobank  
79 Azim. Genotyping, quality control, and imputation procedures have been previously  
80 described (16). A total of 488,232 participants in the UK Biobank were genotyped. In total,  
81 337,409 unrelated samples of European ancestry were then filtered and those with an  
82 incomplete diagnosis of asthma were excluded, leaving 313,816 for analysis (302,686 for  
83 moderate/severe asthma).

84 We derived a genetic risk score (GRS) for asthma and moderate/severe asthma using 24  
85 GWAS SNPs previously reported by Shrine et al. 2019 (2) for each individual participant. The  
86 GRS was generated using PLINK by summing the number of risk (asthma-increasing) alleles,  
87 which were weighted by the respective allelic effect size ( $\beta$ -coefficient) from the discovery  
88 GWAS. For variants not available in UK Biobank, we used the corresponding proxy SNP as  
89 indicated in Table 2 within (2). Scaling of the individual GRS was performed to allow  
90 interpretation of the effects as a per-1 risk allele increase in the GRS (division by twice the

91 sum of the  $\beta$ -coefficients and multiplication by twice the square of the SNP count  
92 representing the maximum number of risk alleles). Analysis of GRS was performed by  
93 subdividing into quartiles, as well as the impact per-1 risk allele. Analysis of the shift work  
94 effect on asthma was performed on all GRS quartiles. The interaction between GRS quartiles  
95 and shift work schedule was tested and a P value for interaction was computed.

96 When investigating continuous variables (lifetime duration and frequency of shift work  
97 including nights (**Figure 3**), and odds by genetic risk score (**Supplementary Tables 6 and 7**) p-  
98 values for the linear trend were obtained by considering the variable as continuous and  
99 running a Wald test to calculate the significance of the variable in our models.

100 To analyse the effect of GRS and chronotype on the relationship of current job shift  
101 schedule on asthma risk we compared models with and without an interaction term  
102 (between job shift schedule and GRS/chronotype). The two models were compared using a  
103 likelihood ratio test and a p-value indicating the significance of the interaction computed.

#### 104 **Supplemental References**

- 105 1. Vetter C, Dashti HS, Lane JM, et al. Night Shift Work, Genetic Risk, and Type 2  
106 Diabetes in the UK Biobank. *Diabetes Care*. 2018;41(4):762–769. doi:10.2337/dc17-  
107 1933
- 108 2. Shrine N, Portelli MA, John C, Soler Artigas M, Bennett N, Hall R, Lewis J, Henry AP,  
109 Billington CK, Ahmad A, Packer RJ, Shaw D, Pogson ZEK, Fogarty A, McKeever TM,  
110 Singapuri A, Heaney LG, Mansur AH, Chaudhuri R, Thomson NC, Holloway JW,  
111 Lockett GA, Howarth PH, Djukanovic R, Hankinson J, Niven R, Simpson A, Chung KF,  
112 Sterk PJ, Blakey JD, Adcock IM, Hu S, Guo Y, Obeidat M, Sin DD, van den Berge M,

- 113 Nickle DC, Bossé Y, Tobin MD, Hall IP, Brightling CE, Wain LV, Sayers I. Moderate-to-  
114 severe asthma in individuals of European ancestry: a genome-wide association  
115 study. *Lancet Respir Med*. 2019 Jan;7(1):20-34. doi: 10.1016/S2213-2600(18)30389-  
116 8. Epub 2018 Dec 11.
- 117 3. Wain LV, Shrine N, Miller S et al. Novel insights into the genetics of smoking  
118 behaviour, lung function, and chronic obstructive pulmonary disease (UK BiLEVE): a  
119 genetic association study in UK Biobank. *Lancet Respir Med*. 2015; 3: 769-781
- 120 4. Gauderman, W. J., Avol, E., Gilliland, F., Vora, H., Thomas, D., Berhane, K.,  
121 McConnell, R., Kuenzli, N., Lurmann, F. & Rappaport, E. (2004). 'The effect of air  
122 pollution on lung development from 10 to 18 years of age', *New England Journal of*  
123 *Medicine*, 351(11), pp. 1057-1067.
- 124 5. Criner, G. J., Martinez, F. J., Anzueto, A., Barnes, P. J. & Bourbeau, J. (2017). 'Global  
125 Strategy for the Diagnosis, Management and Prevention of Chronic Obstructive  
126 Lung Disease 2017 Report'.
- 127 6. Global Initiative for Asthma, P. (2017). 'Global Strategy for Asthma Management  
128 and Prevention: 2017 Update'.
- 129 7. Cukic, V., Lovre, V., Dragisic, D. & Ustamujic, A. (2012). 'Asthma and chronic  
130 obstructive pulmonary disease (COPD)—differences and similarities', *Materia socio-*  
131 *medica*, 24(2), p. 100.46. BTS/SIGN British Guideline on the management of asthma  
132 2019
- 133 8. Jaakkola JJ, Pilpari R, Jaakkola MS. Occupation and asthma; a population-based  
134 incident case-control study. *Am J Epidemiol* 2003;158:981-7

- 135 9. Johnson AR, Dimich-Ward HD, Manfreda J, Becklake MR, Ernst P, Sears MR, Bowie  
136 DM, Sweet L, Chan-Yeung M. Occupational asthma in adults in six Canadian  
137 communities. *Am J Respir Crit Care Med* 2000;162:2058-62
- 138 10. Kogevinas M, Anto JM, Soriano JB, Tobias A, Burney P. The risk of asthma  
139 attributable to occupational exposures. A population-based study in Spain. Spanish  
140 Group of the European Asthma Study. *Am J Respir Crit Care Med* 1996;154:137-43
- 141 11. Kogevinas M, Anto JM, Sunyer J, Tobias A, Kromhout H, Burney P. Occupational  
142 asthma in Europe and other industrialised areas: a population-based study.  
143 European Community Respiratory Health Survey Study Group. *Lancet*  
144 1999;353:1750-4
- 145 12. Horne JA, Ostberg O. A self-assessment questionnaire to determine morningness-  
146 eveningness in human circadian rhythms. *Int J Chronobiol* 1976;4:97-110
- 147 13. Kitamura S, Hilda A, Aritake S et al. Validity of the Japanese version of the Munich  
148 Chronotype Questionnaire. *Chronobiol Int* 2014;31:845-850.
- 149 14. Megdal SP, Schernhammer ES. Correlates for poor sleepers in a Los Angeles high  
150 school. *Sleep Med* 2007;9:60-63
- 151 15. Taillard J, Philip P, Chastang JF, Bioulac B. Validation of Horne and Ostberg  
152 morningness eveningness questionnaire in a middle-aged population of French  
153 workers. *J Biol Rythms* 2004;19:76-86
- 154 16. Lane JM, Vlasac I, Anderson SG, et al. Genome-wide association analysis identifies  
155 novel loci for chronotype in 100,420 individuals from the UK Biobank. *Nat Commun*  
156 2016;7:10889

157

158

**Supplementary Figure 1: STROBE diagram showing filtering of participants for each analysis.** STROBE diagram showing how the full UK Biobank cohort (N=502,540) was filtered for each analysis. Blue boxes correspond to individuals used for the analyses resulting in each figure/table. White boxes show excluded participants at each stage.

163



**Supplementary Table 1: Job Standard Occupational Classification (SOC) category splits by current night shift work exposure (N = 76,162)**

|                                                      | Current work schedule |                                              |                                       |                            |
|------------------------------------------------------|-----------------------|----------------------------------------------|---------------------------------------|----------------------------|
|                                                      | Day workers           | Shift work, but never or rarely night shifts | Irregular shift work including nights | Permanent night shift work |
| N                                                    | 66360                 | 4986                                         | 3640                                  | 1176                       |
| Time in most recent job (years)                      | 20.46 (13.01)         | 20.25 (13.41)                                | 21.62 (13.26)                         | 23.77 (13.34)              |
| Managers and Senior Officials (%)                    | 17.49                 | 12.8                                         | 9.59                                  | 6.21                       |
| Professional Occupations (%)                         | 36.29                 | 18.47                                        | 14.67                                 | 5.7                        |
| Associate Professional and Technical Occupations (%) | 18.25                 | 29.1                                         | 39.67                                 | 38.27                      |
| Administrative and Secretarial Occupations (%)       | 14.27                 | 9.73                                         | 4.48                                  | 6.55                       |
| Skilled Trades Occupations (%)                       | 4.12                  | 6.28                                         | 8.74                                  | 7.4                        |
| Personal Service Occupations (%)                     | 3.64                  | 7.82                                         | 8.05                                  | 10.03                      |
| Sales and Customer Service Occupations (%)           | 2.39                  | 4.83                                         | 2.01                                  | 1.87                       |
| Process, Plant and Machine Operatives (%)            | 1.54                  | 6.14                                         | 9.09                                  | 13.69                      |
| Elementary Occupations (%)                           | 2.03                  | 4.83                                         | 3.71                                  | 10.29                      |

Data are mean (SD) or percentages.

167  
168  
169  
170  
171  
172  
173  
174  
175  
176  
177  
178  
179  
180  
181  
182  
183  
184  
185  
186  
187  
188

Supplementary Table 2: Adjusted odds (95% CI) of any asthma by current shift work exposure (N=266,674)

|                                                       | Current work schedule |                                              |                                       |                            |
|-------------------------------------------------------|-----------------------|----------------------------------------------|---------------------------------------|----------------------------|
|                                                       | Day workers           | Shift work, but never or rarely night shifts | Irregular shift work including nights | Permanent night shift work |
| Total cases (% of total sample size)                  | 11,695 (5.31%)        | 1,306 (5.72%)                                | 872 (5.15%)                           | 365 (5.48%)                |
| Total sample size                                     | 220,234               | 22,838                                       | 16,945                                | 6,657                      |
| Model 1: Age and Sex adjusted OR (95% CI)             | 1 (referent)          | 1.08 (1.02-1.15)                             | 0.98 (0.91-1.05)                      | 1.05 (0.95-1.17)           |
| Model 2: Multivariable adjusted OR (95% CI)           | 1 (referent)          | 1.06 (0.95-1.18)                             | 1.08 (0.95-1.22)                      | 1.23 (1.03-1.46)           |
| Model 3: Model 2 covariates + Sleep Duration (95% CI) | 1 (referent)          | 1.06 (0.95-1.18)                             | 1.07 (0.94-1.21)                      | 1.20 (1.01-1.43)           |

Model 2 covariates: age, sex, smoking status, smoking pack years, alcohol status, daily alcohol intake, ethnicity, Townsend deprivation index, days exercised (walked, moderate and vigorous), BMI, chronotype, length of working week, job asthma risk and job medical required. Model 3 are adjusted for Model 2 covariates plus sleep duration.

196 Supplementary Table 3: Adjusted odds (95% CI) of moderate-severe asthma by  
 197 chronotype (N = 398,252)

|                                                       | Chronotype              |                             |                              |
|-------------------------------------------------------|-------------------------|-----------------------------|------------------------------|
|                                                       | Intermediate chronotype | Definitely a morning person | Definitely an evening person |
| Total cases (% of total sample size)                  | 5,820 (2.28%)           | 2,782 (2.58%)               | 1,002 (2.85%)                |
| Total sample size                                     | 255,089                 | 108,003                     | 35,160                       |
| Model 1: Age and Sex adjusted OR (95% CI)             | 1 (referent)            | 1.10 (1.06-1.16)            | 1.30 (1.21-1.39)             |
| Model 2: Multivariable adjusted OR (95% CI)           | 1 (referent)            | 1.19 (1.05-1.36)            | 1.18 (0.99-1.39)             |
| Model 3: Model 2 covariates + Sleep Duration (95% CI) | 1 (referent)            | 1.19 (1.05-1.35)            | 1.17 (0.99-1.38)             |

198 Model 2 covariates: age, sex, smoking status, smoking pack years, alcohol status, daily  
 199 alcohol intake, ethnicity, Townsend deprivation index, days exercised (walked,  
 200 moderate and vigorous), BMI, length of working week, job asthma risk and job medical  
 201 required. Model 3 data are adjusted for Model 2 covariates plus sleep duration.  
 202

203 Supplementary Table 4: Adjusted odds (95% CI) and association of moderate-  
 204 severe asthma and current shift work exposure by chronotype

| Current work schedule                                       | OR (95% CI)      | P <sub>interaction</sub> |
|-------------------------------------------------------------|------------------|--------------------------|
| <b>Definite morning chronotype (N= 59,621, 1,216 cases)</b> |                  |                          |
| Day workers                                                 | 1 (referent)     | 0.21                     |
| Shift work, but never or rarely night shifts                | 0.97 (0.67-1.39) |                          |
| Irregular shift work including nights                       | 1.55 (1.06-2.27) |                          |
| Permanent night shift work                                  | 1.32 (0.69-2.51) |                          |
| <b>Intermediate chronotype (N= 148,216, 2,645 cases)</b>    |                  |                          |
| Day workers                                                 | 1 (referent)     |                          |
| Shift work, but never or rarely night shifts                | 1.13 (0.90-1.43) |                          |
| Irregular shift work including nights                       | 1.11 (0.84-1.47) |                          |
| Permanent night shift work                                  | 1.33 (0.88-2.00) |                          |
| <b>Definite evening chronotype (N= 20,834, 447 cases)</b>   |                  |                          |
| Day workers                                                 | 1 (referent)     |                          |
| Shift work, but never or rarely night shifts                | 1.18 (0.70-1.99) |                          |
| Irregular shift work including nights                       | 1.10 (0.61-1.99) |                          |
| Permanent night shift work                                  | 1.52 (0.88-2.65) |                          |

205 Models were adjusted for covariates in model 2 (age, sex, smoking status,  
 206 smoking pack years, alcohol status, daily alcohol intake, ethnicity, Townsend  
 207 deprivation index, days exercised (walked, moderate and vigorous), BMI, length  
 208 of working week, job asthma risk and job medical required).  
 209 Interaction p-value is calculated using a LR test comparing the model with and  
 210 without an interaction term.  
 211

Supplementary Table 5: Adjusted odds (95% CI) of moderate-severe asthma by genetic risk score (GRS) quartile (N = 302,686)

|                                                       | GRS quartile  |                  |                  |                  | p-value for trend |
|-------------------------------------------------------|---------------|------------------|------------------|------------------|-------------------|
|                                                       | 1st quartile  | 2nd quartile     | 3rd quartile     | 4th quartile     |                   |
| Total cases (% of total sample size)                  | 1,166 (1.50%) | 1,585 (2.07%)    | 1,906 (2.53%)    | 2,707 (3.71%)    |                   |
| Total sample size                                     | 77,746        | 76,580           | 75,435           | 72,925           |                   |
| Model 1: Age and Sex adjusted OR (95% CI)             | 1 (referent)  | 1.39 (1.29-1.50) | 1.70 (1.58-1.83) | 2.53 (2.36-2.71) | <0.01             |
| Model 2: Multivariable adjusted OR (95% CI)           | 1 (referent)  | 1.22 (0.99-1.52) | 1.70 (1.39-2.08) | 2.66 (2.21-3.22) | <0.01             |
| Model 3: Model 2 covariates + Sleep Duration (95% CI) | 1 (referent)  | 1.23 (0.99-1.52) | 1.71 (1.40-2.09) | 2.67 (2.21-3.23) | <0.01             |

Model 2 covariates: age, sex, smoking status, smoking pack years, alcohol status, daily alcohol intake, Townsend deprivation index, days exercised (walked, moderate and vigorous), BMI, phenotype, length of working week, job asthma risk and job medical required. Model 3 data are adjusted for Model 2 covariates plus sleep duration.

Supplementary Table 6: Adjusted odds (95% CI) of any asthma by genetic risk score (GRS) quartile (N = 313,816)

|                                                       | GRS quartile  |                  |                  |                  | p-value for trend |
|-------------------------------------------------------|---------------|------------------|------------------|------------------|-------------------|
|                                                       | 1st quartile  | 2nd quartile     | 3rd quartile     | 4th quartile     |                   |
| Total cases (% of total sample size)                  | 3,106 (3.90%) | 3,942 (4.99%)    | 4,818 (6.15%)    | 6,628 (8.63%)    |                   |
| Total sample size                                     | 79,686        | 78,937           | 78,347           | 76,846           |                   |
| Model 1: Age and Sex adjusted OR                      | 1 (referent)  | 1.30 (1.23-1.36) | 1.62 (1.54-1.69) | 2.33 (2.23-2.43) | <0.01             |
| Model 2: Multivariable adjusted OR (95% CI)           | 1 (referent)  | 1.24 (1.09-1.41) | 1.52 (1.35-1.72) | 2.33 (2.08-2.61) | <0.01             |
| Model 3: Model 2 covariates + Sleep Duration (95% CI) | 1 (referent)  | 1.24 (1.10-1.41) | 1.53 (1.35-1.72) | 2.33 (2.08-2.61) | <0.01             |

Model 2 covariates: age, sex, smoking status, smoking pack years, alcohol status, daily alcohol intake, Townsend deprivation index, days exercised (walked, moderate and vigorous), BMI, ethnicity, length of working week, job asthma risk and job medical required. Model 3 data are adjusted for Model 2 covariates plus sleep duration.

226 Supplementary Table 7: Adjusted odds (95% CI) and association of moderate-  
 227 severe asthma and current shift work exposure by genetic risk

| Current work schedule                                         | OR (95% CI)      | P <sub>interaction</sub> |
|---------------------------------------------------------------|------------------|--------------------------|
| <b>GRS first quartile (lowest) (N= 44,088, 475 cases)</b>     |                  |                          |
| Day workers                                                   | 1 (referent)     | <0.05                    |
| Shift work, but never or rarely night shifts                  | 1.18 (0.71-1.96) |                          |
| Irregular shift work including nights                         | 0.74 (0.35-1.53) |                          |
| Permanent night shift work                                    | 1.67 (0.80-3.51) |                          |
| <b>GRS second quartile (N= 43,396, 667 cases)</b>             |                  |                          |
| Day workers                                                   | 1 (referent)     |                          |
| Shift work, but never or rarely night shifts                  | 1.78 (1.17-2.68) |                          |
| Irregular shift work including nights                         | 1.26 (0.72-2.23) |                          |
| Permanent night shift work                                    | 1.57 (0.75-3.27) |                          |
| <b>GRS third quartile (N= 42,507, 846 cases)</b>              |                  |                          |
| Day workers                                                   | 1 (referent)     |                          |
| Shift work, but never or rarely night shifts                  | 1.41 (0.95-2.09) |                          |
| Irregular shift work including nights                         | 1.22 (0.74-2.02) |                          |
| Permanent night shift work                                    | 2.04 (1.11-3.74) |                          |
| <b>GRS fourth quartile (highest) (N= 40,905, 1,218 cases)</b> |                  |                          |
| Day workers                                                   | 1 (referent)     |                          |
| Shift work, but never or rarely night shifts                  | 0.93 (0.64-1.35) |                          |
| Irregular shift work including nights                         | 1.42 (0.97-2.10) |                          |
| Permanent night shift work                                    | 1.52 (0.90-2.56) |                          |

228 Models were adjusted for covariates in model 2 (age, sex, smoking status,  
 229 smoking pack years, alcohol status, daily alcohol intake, ethnicity, Townsend  
 230 deprivation index, days exercised (walked, moderate and vigorous), BMI,  
 231 chronotype, length of working week, job asthma risk and job medical required).  
 232 Interaction p-value is calculated using a LR test comparing the model with and  
 233 without an interaction term.

234  
 235  
 236  
 237  
 238  
 239  
 240

Supplementary Table 8: Adjusted odds (95% CI) of moderate-severe asthma by current shift work exposure after excluding participants with doctor diagnosed Chronic Obstructive Pulmonary Disease (COPD), emphysema or chronic bronchitis (N = 255,647)

|                                                       | Current work schedule |                                              |                                       |                            |
|-------------------------------------------------------|-----------------------|----------------------------------------------|---------------------------------------|----------------------------|
|                                                       | Day workers           | Shift work, but never or rarely night shifts | Irregular shift work including nights | Permanent night shift work |
| Total cases (% of total sample size)                  | 3,668 (1.74%)         | 418 (1.92%)                                  | 267 (1.65%)                           | 119 (1.87%)                |
| Total sample size                                     | 211,283               | 21,787                                       | 16,225                                | 6,352                      |
| Model 1: Age and Sex adjusted OR (95% CI)             | 1 (referent)          | 1.12 (1.01-1.24)                             | 1.02 (0.90-1.15)                      | 1.15 (0.96-1.39)           |
| Model 2: Multivariable adjusted OR (95% CI)           | 1 (referent)          | 1.15 (0.96-1.39)                             | 1.13 (0.90-1.40)                      | 1.35 (1.01-1.82)           |
| Model 3: Model 2 covariates + Sleep Duration (95% CI) | 1 (referent)          | 1.15 (0.96-1.38)                             | 1.12 (0.90-1.39)                      | 1.33 (0.99-1.79)           |

Model 2 covariates: age, sex, smoking status, smoking pack years, alcohol status, daily alcohol intake, ethnicity, Townsend deprivation index, days exercised (walked, moderate and vigorous), BMI, chronotype, length of working week, job asthma risk and job medical required. Model 3 data are adjusted for Model 2 covariates plus sleep duration.

248  
249  
250  
251  
252  
253  
254  
255  
256  
257  
258  
259  
260  
261  
262  
263  
264  
265  
266  
267  
268  
269  
270  
271  
272  
273  
274



275

Supplementary Table 9: Adjusted odds (95% CI) of any asthma by current shift work exposure after excluding participants with doctor diagnosed Chronic Obstructive Pulmonary Disease (COPD), emphysema or chronic bronchitis (N = 264,884)

|                                                       | Current work schedule |                                              |                                       |                            |
|-------------------------------------------------------|-----------------------|----------------------------------------------|---------------------------------------|----------------------------|
|                                                       | Day workers           | Shift work, but never or rarely night shifts | Irregular shift work including nights | Permanent night shift work |
| Total cases (% of total sample size)                  | 11,290 (5.16%)        | 1,247 (5.51%)                                | 823 (4.90%)                           | 349 (5.30%)                |
| Total sample size                                     | 218,905               | 22,616                                       | 16,781                                | 6,582                      |
| Model 1: Age and Sex adjusted OR (95% CI)             | 1 (referent)          | 1.07 (1.01-1.14)                             | 0.96 (0.89-1.03)                      | 1.04 (0.93-1.16)           |
| Model 2: Multivariable adjusted OR (95% CI)           | 1 (referent)          | 1.04 (0.93-1.16)                             | 1.05 (0.92-1.19)                      | 1.26 (1.05-1.50)           |
| Model 3: Model 2 covariates + Sleep Duration (95% CI) | 1 (referent)          | 1.04 (0.93-1.16)                             | 1.04 (0.91-1.18)                      | 1.23 (1.03-1.48)           |

Model 2 covariates: age, sex, smoking status, smoking pack years, alcohol status, daily alcohol intake, ethnicity, Townsend deprivation index, days exercised (walked, moderate and vigorous), BMI, chronotype, length of working week, job asthma risk and job medical required. Model 3 are adjusted for Model 2 covariates plus sleep duration.

283

284

285
